# Supplementary material for: Conceptual Design of an Autotrophic Multi-Strain Microalgae-Based Biorefinery: Preliminary Techno-Economic and Life Cycle Assessments
Source: MDPI journal article supplement (doi:10.3390/fermentation9030255), 2023-03-04
Supplement: s1 [file s1]

# Supplementary Materials for “Fermentation-2205538”

**Table S1.** Mass and energy balances for a biomass production of 10 and 270 ton<sub>AFDW</sub>·year<sup>-1</sup>, obtained from the SuperPro Designer model

| Scale<br>(ton <sub>AFDW</sub> ·year <sup>-1</sup> ) | Parameter                           | Strain (S) |           |          |
|-----------------------------------------------------|-------------------------------------|------------|-----------|----------|
|                                                     |                                     | #1         | #2        | #3       |
| 10                                                  | <i>per day</i>                      |            |           |          |
|                                                     | Total raw materials (kg)            | 33.93      | 278.05    | 87.79    |
|                                                     | Consumed carbon dioxide (kg)        | 54.41      | 51.11     | 54.14    |
|                                                     | Water (m <sup>3</sup> )             | 0.70       | 2.05      | 0.70     |
|                                                     | Electricity consumption – SS1 (kWh) | 301.17     | 131.79    | 312.86   |
|                                                     | Electricity consumption – SS2 (kWh) | 20.92      | 30.75     | 20.92    |
|                                                     | Electricity consumption – SS3 (kWh) | 6.35       | 22.22     | 4.82     |
|                                                     | <i>per kg<sub>AFDW</sub></i>        |            |           |          |
|                                                     | Total raw materials (kg)            | 1.14       | 9.31      | 2.94     |
|                                                     | Consumed carbon dioxide (kg)        | 1.82       | 1.71      | 1.81     |
|                                                     | Water (m <sup>3</sup> )             | 0.02       | 0.07      | 0.02     |
|                                                     | Electricity consumption – SS1 (kWh) | 10.09      | 4.41      | 10.48    |
|                                                     | Electricity consumption – SS2 (kWh) | 0.70       | 1.03      | 0.70     |
|                                                     | Electricity consumption – SS3 (kWh) | 0.21       | 0.74      | 0.16     |
| 270                                                 | <i>per day</i>                      |            |           |          |
|                                                     | Total raw materials (kg)            | 916.24     | 7 506.97  | 2 370.41 |
|                                                     | Consumed carbon dioxide (kg)        | 1 469.24   | 1 379.71  | 1 461.56 |
|                                                     | Water (m <sup>3</sup> )             | 18.81      | 55.22     | 18.79    |
|                                                     | Electricity consumption – SS1 (kWh) | 8 131.58   | 12 157.89 | 8 447.37 |
|                                                     | Electricity consumption – SS2 (kWh) | 564.89     | 830.33    | 564.89   |
|                                                     | Electricity consumption – SS3 (kWh) | 171.43     | 600.00    | 130.26   |
|                                                     | <i>per kg<sub>AFDW</sub></i>        |            |           |          |
|                                                     | Total raw materials (kg)            | 1.24       | 10.15     | 3.20     |
|                                                     | Consumed carbon dioxide (kg)        | 1.99       | 1.87      | 1.98     |
|                                                     | Water (m <sup>3</sup> )             | 0.03       | 0.07      | 0.03     |
|                                                     | Electricity consumption – SS1 (kWh) | 10.99      | 16.44     | 11.42    |
|                                                     | Electricity consumption – SS2 (kWh) | 0.76       | 1.12      | 0.76     |
|                                                     | Electricity consumption – SS3 (kWh) | 0.23       | 0.81      | 0.18     |
